# Supplementary material
Source: PubMed Central journal article supplement (PMC5753863)
Supplement: 283FileS1.pdf [file 283FileS1.pdf]

**DNA**

ism1 823 ATGTTGCGACTGGCAGCGGAGCTTCTGCTTCTCCTGGGACTGCTCCTCCTCACCCCTGCAC 882  
uninjected\_emb1 ATGTTGCGACTGGCAGCGGAGCTTCTGCTTCTCCTGGGACTGCTCCTCCTCACCCCTGCAC  
ism1\_T3\_emb1.1 ATGTTGCGACTGGCAGCGGAGCTTCTGCTTCTCCTGGGACTGCTCCTCCTCACCCCTGCAC  
ism1\_T3\_emb1.2 ATGTTGCGACTGGCAGCGGAGCTTCTGCTTCTCCTGGGACTGCTCCTCCTCACCCCTGCAC  
ism1\_T3\_emb1.3 ATGTTGCGACTGGCAGCGGAGCTTCTGCTTCTCCTGGGACTGCTCCTCCTCCTCATAACAG  
ism1\_T3\_emb1.4 ATGTTGCGACTGGCAGCGGAGCTTCTGCTTCTCCTGGGACTGCTCCTCCTCCTCATAACAG

ism1 883 ATCACTGTGCTCCGAGGCAGCCCCGATAGCTCCTCCAACTCCAGCCACAGCCTCATAACAG 942  
uninjected\_emb1 ATCACTGTGCTCCGAGGCAGCCCCGATAGCTCCTCCAACTCCAGCCACAGCCTCATAACAG  
ism1\_T3\_emb1.1 ATCACTGTGCTCCGAG-----CCAGCCACAGCCTCATAACAG  
ism1\_T3\_emb1.2 ATCACTGTGCTCCGAGGCAGCCCCGAT-----ACTCCAGCCACAGCCTCATAACAG  
ism1\_T3\_emb1.3 GTCAGTCCATTCCATTCCA--CATAACAGGTCAGTCCATTCCACATAACAGGT----CAG  
ism1\_T3\_emb1.4 GTCAGTCCATTCCATTCCA--CATAACAGGTCAGTCCATTCCACATAACAGGT----CAG

ism1 943 GTCAGTCCATTCCACATAACAG 964  
uninjected\_emb1 GTCAGTCCATTCCCTCATAACAG  
ism1\_T3\_emb1.1 GTCAGTCCATTCCACATAACAG  
ism1\_T3\_emb1.2 GTCAGTCCATTCCACATAACAG  
ism1\_T3\_emb1.3 TCCATTCCATTCCACATAACAG  
ism1\_T3\_emb1.4 TCCATTCCATTCCACATAACAG

**mRNA**

ism1 1 MLRLAAELLLLLGLLLLTLHITVLRG^SPDSSSNSSHSLIQVSPFHIQ...  
uninjected\_emb1 MLRLAAELLLLLGLLLLTLHITVLRG^SPDSSSNSSHSLIQVSPFHIQ...  
ism1\_T3\_emb1.1 MLRLAAELLLLLGLLLLTLHITVLRV-----SSHSLIQVSPFHIQ...  
ism1\_T3\_emb1.2 MLRLAAELLLLLGLLLLTLHITVLRG^SPD---YSSHSLIQVSPFHIQ...  
ism1\_T3\_emb1.3 MLRLAAELLLLLGLLLLLIQVSP^FHSISYRSVHSTYRF-QSIPFHIQ  
ism1\_T3\_emb1.4 MLRLAAELLLLLGLLLLLIQVSP^FHSISYRSVHSTYRF-QSIPFHIQ

Human ISM1 MVRLAAELLLLLGLLLLTLHITVLRG^SGA  
(signal seq.)

**Supplemental Figure 1: Representative sequencing results for embryos injected using a CRISPR/Cas9 strategy.** Shown here are sequencing results of multiple independent clones (ism1\_T3\_emb1.1-4) from a single CRISPR/Cas9-mutated embryo compared to an uninjected control showing multiple genetic aberrations of *ism1* per embryo. Guide RNA site is underlined. ^Indicates predicted signal peptide cleavage site.

Pedigree 1

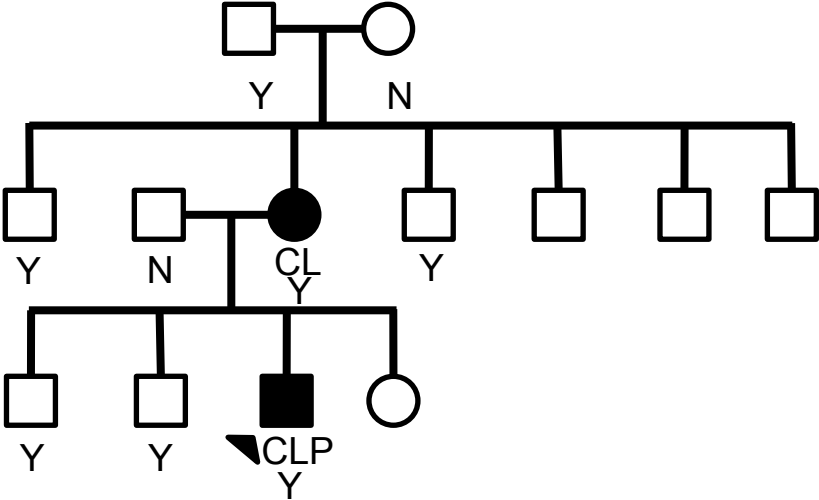

Key

Y = Deletion Detected  
N = No Deletion Detected

Pedigree 2

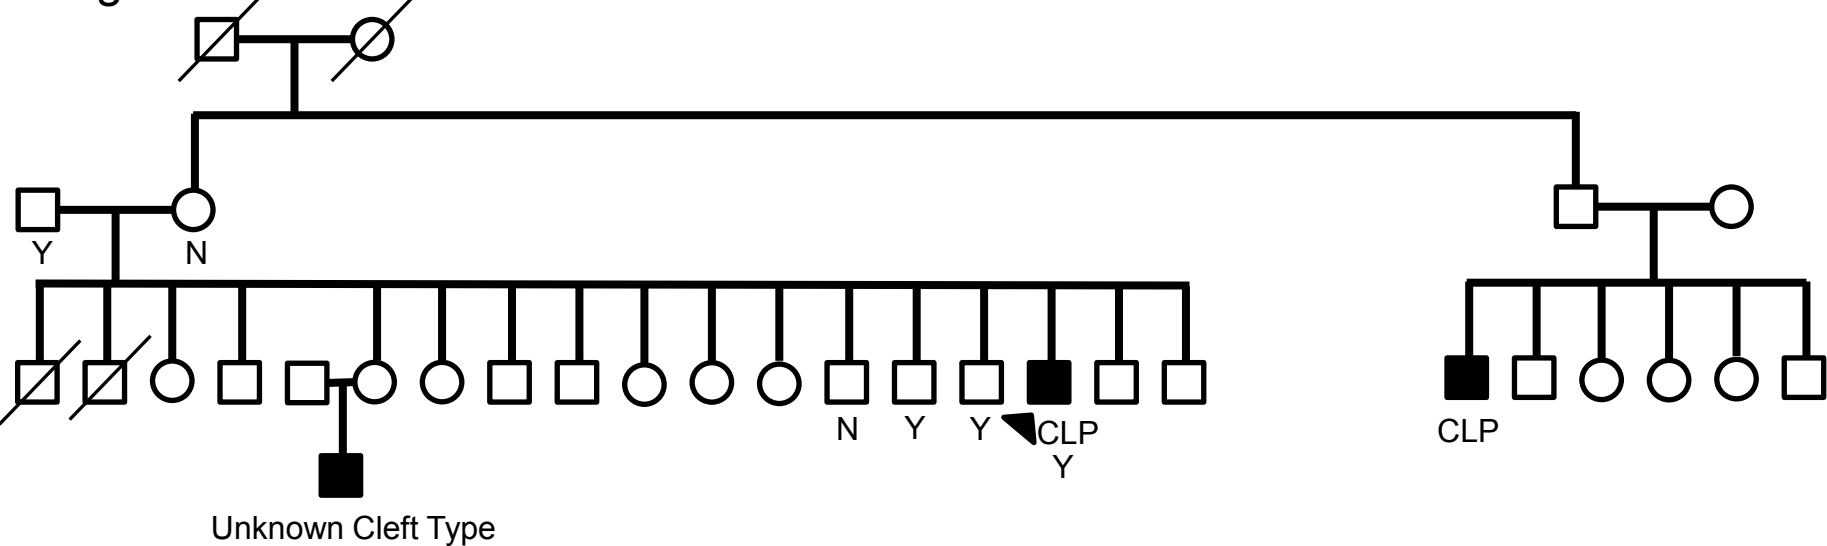

**Supplemental Figure 2: Pedigrees of individuals harboring the *ISMI* deletions.** (Pedigree 1) The 12kb deletion 3' of *ISMI* was detected in the proband's mother who is affected with a cleft lip (CL), unaffected brothers, maternal grandfather and one maternal uncle. (Pedigree 2) The 603kb deletion is paternally inherited and was identified in two unaffected brothers. Two additional individuals are affected in the pedigree but due to lack of samples they could not be tested.

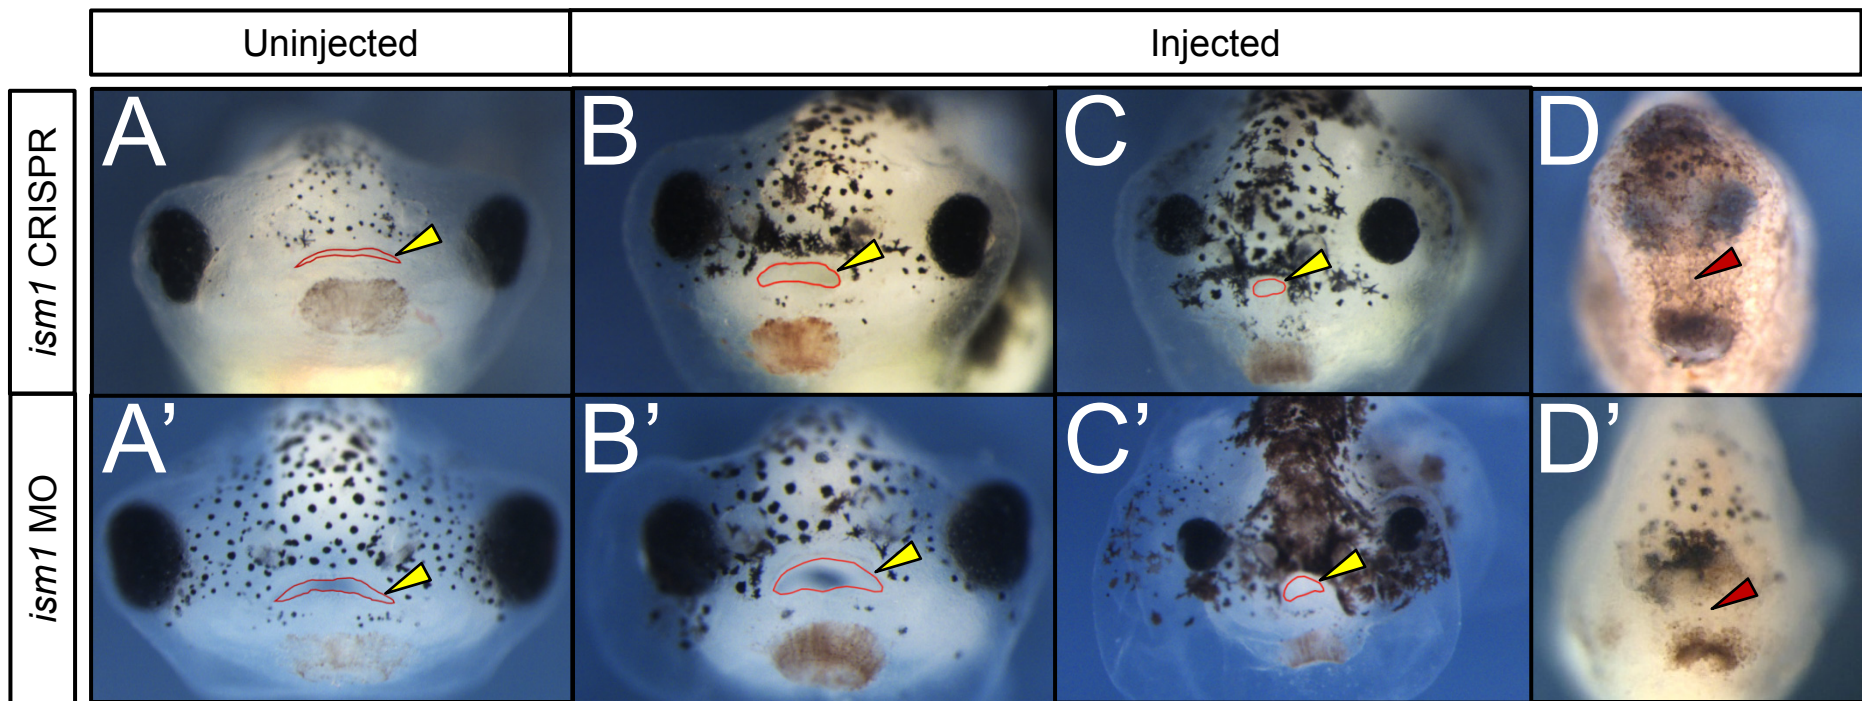

**Supplemental Figure 3: Comparison of morpholino and CRISPR/Cas9 injected embryos.** Embryos injected with a high-dose (48ng) of translation blocking *ism1* morpholino (MO) exhibit similar phenotypes as embryos injected with CRISPR/Cas9 oligos targeting *ism1*. Yellow arrowheads indicate mouths of the embryos while red arrowheads indicate complete absence of mouth development.

| <b>Chromosome Region (HG19)</b> | <b>Individual ID</b> | <b>Event</b> | <b>Length (bp)</b> | <b>Cytoband</b> | <b>% of Overlap with CNV in DGV or Seg Dup</b> | <b>Probe Median</b> | <b>Probes</b> | <b>Count of Gene Symbols</b> | <b>Count of Exons</b> | <b>Gene Symbols</b>                                 |
|---------------------------------|----------------------|--------------|--------------------|-----------------|------------------------------------------------|---------------------|---------------|------------------------------|-----------------------|-----------------------------------------------------|
| chr1:161631150-161844639        | CleftProband_66      | Gain         | 213490             | 1q23.3          | 12.41                                          | 0.53                | 164           | 6                            | 122                   | <i>FCGR2B, RPL31P11, FCRLA, FCRLB, DUSP12, ATF6</i> |
| chr1:212006532-212214302        | CleftProband_58      | Gain         | 207771             | 1q32.3          | 0.00                                           | 0.55                | 163           | 3                            | 110                   | <i>LOC102723727, INTS7, DTL</i>                     |
| chr1:226161393-226171960        | CleftProband_105     | Loss         | 10568              | 1q42.12         | 0.00                                           | -0.96               | 8             | 1                            | 1                     | <i>SDE2</i>                                         |
| chr1:226161393-226171960        | CleftProband_84      | Loss         | 10568              | 1q42.12         | 0.00                                           | -0.82               | 8             | 1                            | 1                     | <i>SDE2</i>                                         |
| chr1:234491011-234564609        | CleftProband_13      | Loss         | 73599              | 1q42.2          | 0.00                                           | -0.90               | 62            | 3                            | 24                    | <i>LOC101927765, COA6, TARBP1</i>                   |
| chr1:245172706-245187353        | CleftProband_68      | Gain         | 14648              | 1q44            | 0.12                                           | 0.53                | 12            | 1                            | 3                     | <i>EFCAB2</i>                                       |
| chr1:245172706-245187353        | CleftProband_106     | Gain         | 14648              | 1q44            | 0.12                                           | 0.61                | 12            | 1                            | 3                     | <i>EFCAB2</i>                                       |
| chr1:247108435-247122814        | CleftProband_137     | Loss         | 14380              | 1q44            | 0.00                                           | -0.97               | 11            | 2                            | 3                     | <i>ZNF695, ZNF670-ZNF695</i>                        |
| chr1:27719038-27742111          | CleftProband_73      | Gain         | 23074              | 1p36.11         | 25.86                                          | 0.82                | 18            | 2                            | 9                     | <i>GPR3, WASF2</i>                                  |
| chr1:39377221-39405248          | CleftProband_30      | Loss         | 28028              | 1p34.3          | 0.00                                           | -0.78               | 23            | 1                            | 5                     | <i>RHBDL2</i>                                       |
| chr1:40452270-40510508          | CleftProband_92      | Loss         | 58239              | 1p34.2          | 0.31                                           | -0.74               | 43            | 1                            | 3                     | <i>CAP1</i>                                         |

|                           |                  |      |        |                   |       |       |     |   |     |                             |
|---------------------------|------------------|------|--------|-------------------|-------|-------|-----|---|-----|-----------------------------|
| chr1:40452270-40511345    | CleftProband_5   | Loss | 59076  | 1p34.2            | 0.31  | -0.70 | 44  | 1 | 3   | <i>CAP1</i>                 |
| chr1:49784601-50014768    | CleftProband_32  | Loss | 230168 | 1p33              | 36.54 | -0.87 | 169 | 2 | 4   | <i>AGBL4, AGBL4-IT1</i>     |
| chr1:54911801-55014065    | CleftProband_6   | Gain | 102265 | 1p32.3            | 15.28 | 0.69  | 71  | 1 | 2   | <i>ACOT11</i>               |
| chr10:134630599-134646935 | CleftProband_130 | Gain | 16337  | 10q26.3           | 35.79 | 1.17  | 9   | 1 | 1   | <i>CFAP46</i>               |
| chr10:17334656-17606693   | CleftProband_131 | Loss | 272038 | 10p12.33          | 1.01  | -0.99 | 212 | 2 | 27  | <i>ST8SIA6, ST8SIA6-AS1</i> |
| chr10:19853134-19863618   | CleftProband_71  | Loss | 10485  | 10p12.33 - p12.32 | 0.00  | -1.12 | 9   | 1 | 1   | <i>MALRD1</i>               |
| chr10:19853134-19863618   | CleftProband_70  | Loss | 10485  | 10p12.33 - p12.32 | 0.00  | -1.10 | 9   | 1 | 1   | <i>MALRD1</i>               |
| chr10:23612640-23622814   | CleftProband_32  | Gain | 10175  | 10p12.2           | 0.00  | 0.59  | 6   | 1 | 1   | <i>C10orf67</i>             |
| chr10:514552-541103       | CleftProband_6   | Gain | 26552  | 10p15.3           | 1.02  | 0.65  | 23  | 1 | 2   | <i>DIP2C</i>                |
| chr10:51513243-51550524   | CleftProband_52  | Gain | 37282  | 10q11.23          | 20.60 | 0.60  | 28  | 2 | 2   | <i>MSMB, TIMM23B</i>        |
| chr10:51513243-51552073   | CleftProband_107 | Gain | 38831  | 10q11.23          | 19.78 | 0.64  | 29  | 2 | 2   | <i>MSMB, TIMM23B</i>        |
| chr10:5409736-5449369     | CleftProband_131 | Gain | 39634  | 10p15.1           | 6.30  | 0.72  | 32  | 2 | 9   | <i>UCN3, TUBAL3</i>         |
| chr10:69779004-69974628   | CleftProband_136 | Gain | 195625 | 10q21.3           | 0.64  | 0.60  | 153 | 2 | 137 | <i>HERC4, MYPN</i>          |



|                         |                  |      |        |          |       |       |     |    |    |                                                                                                 |
|-------------------------|------------------|------|--------|----------|-------|-------|-----|----|----|-------------------------------------------------------------------------------------------------|
| chr10:90948510-91396619 | CleftProband_18  | Gain | 448110 | 10q23.31 | 6.27  | 0.61  | 344 | 11 | 88 | <i>CH25H, LIPA, IFIT2**, IFIT3, IFIT1B, IFIT1, IFIT5, SLC16A12-AS1, SLC16A12, MIR107, PANK1</i> |
| chr11:365864-377721     | CleftProband_17  | Gain | 11858  | 11p15.5  | 0.00  | 0.87  | 7   | 1  | 14 | <i>B4GALNT4</i>                                                                                 |
| chr11:5509812-5519989   | CleftProband_26  | Loss | 10178  | 11p15.4  | 0.00  | -0.95 | 9   | 2  | 1  | <i>OR51B5, OR52D1</i>                                                                           |
| chr11:60549417-60586456 | CleftProband_6   | Loss | 37040  | 11q12.2  | 1.67  | -1.12 | 28  | 1  | 8  | <i>MS4A10</i>                                                                                   |
| chr11:8414939-8462604   | CleftProband_136 | Loss | 47666  | 11p15.4  | 5.20  | -1.07 | 34  | 1  | 16 | <i>STK33</i>                                                                                    |
| chr12:179170-234115     | CleftProband_16  | Gain | 54946  | 12p13.33 | 27.13 | 0.57  | 46  | 1  | 3  | <i>IQSEC3</i>                                                                                   |
| chr12:360068-464833     | CleftProband_76  | Gain | 104766 | 12p13.33 | 0.00  | 0.65  | 79  | 3  | 31 | <i>SLC6A13, LOC102723544, KDM5A</i>                                                             |
| chr12:4719026-4772107   | CleftProband_124 | Gain | 53082  | 12p13.32 | 19.31 | 0.84  | 45  | 3  | 27 | <i>DYRK4, AKAP3, NDUFA9</i>                                                                     |
| chr12:72173086-72188140 | CleftProband_24  | Gain | 15055  | 12q21.1  | 20.45 | 1.11  | 13  | 1  | 3  | <i>RAB21</i>                                                                                    |
| chr12:72173086-72276664 | CleftProband_134 | Gain | 103579 | 12q21.1  | 9.56  | 0.89  | 79  | 3  | 21 | <i>RAB21, MRS2P2, TBC1D15</i>                                                                   |
| chr12:72173086-72283834 | CleftProband_53  | Gain | 110749 | 12q21.1  | 8.94  | 0.47  | 86  | 3  | 24 | <i>RAB21, MRS2P2, TBC1D15</i>                                                                   |
| chr12:72173086-72283834 | CleftProband_127 | Gain | 110749 | 12q21.1  | 8.94  | 0.56  | 86  | 3  | 24 | <i>RAB21, MRS2P2, TBC1D15</i>                                                                   |

|                         |                  |      |         |          |       |       |      |   |    |                               |
|-------------------------|------------------|------|---------|----------|-------|-------|------|---|----|-------------------------------|
| chr12:72174000-72281874 | CleftProband_113 | Gain | 107875  | 12q21.1  | 9.18  | 0.47  | 83   | 3 | 24 | <i>RAB21, MRS2P2, TBC1D15</i> |
| chr12:72190776-72283834 | CleftProband_24  | Gain | 72198   | 12q21.1  | 5.80  | 1.00  | 53   | 2 | 6  | <i>MRS2P2, TBC1D15</i>        |
| chr12:7586838-7607779   | CleftProband_111 | Loss | 20942   | 12p13.31 | 9.47  | -0.99 | 17   | 1 | 4  | <i>CD163L1</i>                |
| chr12:7586838-7607779   | CleftProband_109 | Loss | 20942   | 12p13.31 | 9.47  | -0.91 | 17   | 1 | 4  | <i>CD163L1</i>                |
| chr13:67355803-67501956 | CleftProband_72  | Loss | 146154  | 13q21.32 | 2.22  | -0.87 | 126  | 2 | 8  | <i>PCDH9, PCDH9-AS2</i>       |
| chr13:98081584-98092624 | CleftProband_50  | Gain | 11041   | 13q32.1  | 0.00  | 0.49  | 10   | 1 | 1  | <i>RAP2A</i>                  |
| chr14:25367816-26852615 | CleftProband_8   | Gain | 1484800 | 14q12    | 1.82  | 0.45  | 1158 | 1 | 7  | <i>STXBP6</i>                 |
| chr14:44749975-45023734 | CleftProband_120 | Loss | 273760  | 14q21.3  | 0.00  | -0.96 | 191  | 2 | 4  | <i>FSCB, LOC105370473</i>     |
| chr14:44822079-45023734 | CleftProband_127 | Loss | 201656  | 14q21.3  | 0.00  | -1.03 | 138  | 2 | 4  | <i>FSCB, LOC105370473</i>     |
| chr15:51344424-51356893 | CleftProband_69  | Loss | 12470   | 15q21.2  | 0.00  | -0.89 | 11   | 2 | 2  | <i>TNFAIP8L3, MIR4713HG</i>   |
| chr15:57107766-57297943 | CleftProband_60  | Gain | 190178  | 15q21.3  | 0.00  | 0.55  | 145  | 2 | 48 | <i>LOC145783, TCF12</i>       |
| chr15:93626518-93637718 | CleftProband_98  | Loss | 11201   | 15q26.1  | 0.00  | -0.78 | 10   | 1 | 2  | <i>RGMA</i>                   |
| chr16:216901-237122     | CleftProband_52  | Loss | 20222   | 16p13.3  | 43.47 | -0.86 | 15   | 3 | 9  | <i>HBA2, HBA1, HBQ1</i>       |

|                         |                  |      |        |          |       |       |     |   |     |                                       |
|-------------------------|------------------|------|--------|----------|-------|-------|-----|---|-----|---------------------------------------|
| chr16:68575089-68774733 | CleftProband_84  | Loss | 199645 | 16q22.1  | 9.41  | -0.99 | 141 | 3 | 82  | <i>ZFP90, CDH3, CDH1**</i>            |
| chr17:13186916-13531727 | CleftProband_80  | Gain | 344812 | 17p12    | 0.87  | 0.71  | 293 | 2 | 2   | <i>LINC02093, HS3ST3A1</i>            |
| chr17:26715416-26746199 | CleftProband_130 | Gain | 30784  | 17q11.2  | 0.00  | 0.47  | 27  | 2 | 14  | <i>SARM1, SLC46A1**</i>               |
| chr17:41587266-41772492 | CleftProband_124 | Gain | 185227 | 17q21.31 | 0.92  | 0.61  | 145 | 3 | 151 | <i>DHX8, ETV4, MEOX1</i>              |
| chr17:57919964-57945360 | CleftProband_3   | Gain | 25397  | 17q23.1  | 1.92  | 0.52  | 18  | 1 | 16  | <i>TUBD1</i>                          |
| chr17:78225607-78326928 | CleftProband_134 | Gain | 101322 | 17q25.3  | 4.18  | 0.60  | 69  | 3 | 55  | <i>SLC26A11, RNF213, LOC100294362</i> |
| chr17:967314-1120134    | CleftProband_54  | Gain | 152821 | 17p13.3  | 36.45 | 0.51  | 115 | 1 | 53  | <i>ABR</i>                            |
| chr18:13978807-14132035 | CleftProband_103 | Gain | 153229 | 18p11.21 | 18.09 | 0.61  | 102 | 1 | 7   | <i>ZNF519</i>                         |
| chr18:2795134-2831565   | CleftProband_14  | Gain | 36432  | 18p11.32 | 0.00  | 0.45  | 24  | 1 | 3   | <i>SMCHD1</i>                         |
| chr18:29647247-29677751 | CleftProband_66  | Gain | 30505  | 18q12.1  | 19.72 | 0.95  | 22  | 2 | 5   | <i>RNF125, RNF138</i>                 |
| chr18:44478317-44514278 | CleftProband_91  | Loss | 35962  | 18q21.1  | 0.00  | -1.00 | 20  | 1 | 37  | <i>PIAS2</i>                          |
| chr19:39338101-39349508 | CleftProband_135 | Loss | 11408  | 19q13.2  | 0.00  | -1.08 | 7   | 1 | 2   | <i>HNRNPL</i>                         |
| chr19:39338101-39349508 | CleftProband_18  | Loss | 11408  | 19q13.2  | 0.00  | -0.76 | 7   | 1 | 2   | <i>HNRNPL</i>                         |

|                          |                  |      |        |          |      |       |     |   |     |                             |
|--------------------------|------------------|------|--------|----------|------|-------|-----|---|-----|-----------------------------|
| chr19:39339100-39349508  | CleftProband_81  | Loss | 10409  | 19q13.2  | 0.00 | -0.80 | 6   | 1 | 2   | <i>HNRNPL</i>               |
| chr19:50041198-50062100  | CleftProband_41  | Loss | 20903  | 19q13.33 | 3.07 | -1.02 | 15  | 2 | 13  | <i>RCN3, NOSIP**</i>        |
| chr2:10885208-10895660   | CleftProband_113 | Gain | 10453  | 2p25.1   | 0.00 | 0.92  | 8   | 1 | 2   | <i>ATP6VIC2</i>             |
| chr2:10885208-10895660   | CleftProband_47  | Gain | 10453  | 2p25.1   | 0.00 | 0.94  | 8   | 1 | 2   | <i>ATP6VIC2</i>             |
| chr2:10885208-10895660   | CleftProband_12  | Gain | 10453  | 2p25.1   | 0.00 | 0.94  | 8   | 1 | 2   | <i>ATP6VIC2</i>             |
| chr2:10885208-10895660   | CleftProband_26  | Gain | 10453  | 2p25.1   | 0.00 | 1.12  | 8   | 1 | 2   | <i>ATP6VIC2</i>             |
| chr2:116533395-116676085 | CleftProband_125 | Loss | 142691 | 2q14.1   | 0.42 | -0.76 | 110 | 1 | 194 | <i>DPP10</i>                |
| chr2:116533395-116676085 | CleftProband_80  | Loss | 142691 | 2q14.1   | 0.42 | -0.74 | 110 | 1 | 194 | <i>DPP10</i>                |
| chr2:116533395-116676085 | CleftProband_106 | Loss | 142691 | 2q14.1   | 0.42 | -0.71 | 110 | 1 | 194 | <i>DPP10</i>                |
| chr2:116533395-116676085 | CleftProband_42  | Loss | 142691 | 2q14.1   | 0.42 | -0.70 | 110 | 1 | 194 | <i>DPP10</i>                |
| chr2:133915831-134054703 | CleftProband_7   | Gain | 138873 | 2q21.2   | 0.01 | 0.66  | 115 | 2 | 7   | <i>NCKAP5, LOC101928161</i> |
| chr2:162746046-162771755 | CleftProband_102 | Loss | 25710  | 2q24.2   | 0.08 | -1.01 | 20  | 1 | 15  | <i>SLC4A10</i>              |
| chr2:186538-224408       | CleftProband_6   | Gain | 37871  | 2p25.3   | 0.59 | 0.72  | 33  | 1 | 8   | <i>SH3YL1</i>               |
| chr2:188915-227936       | CleftProband_133 | Gain | 39022  | 2p25.3   | 0.58 | 0.63  | 34  | 1 | 12  | <i>SH3YL1</i>               |

|                          |                  |      |        |                  |       |       |      |    |     |                                                                                              |
|--------------------------|------------------|------|--------|------------------|-------|-------|------|----|-----|----------------------------------------------------------------------------------------------|
| chr2:217489537-217500592 | CleftProband_30  | Gain | 11056  | 2q35             | 29.37 | 0.64  | 8    | 1  | 4   | <i>IGFBP2</i>                                                                                |
| chr2:228665165-228740875 | CleftProband_72  | Gain | 75711  | 2q36.3           | 3.38  | 0.48  | 60   | 2  | 11  | <i>CCL20, DAW1</i>                                                                           |
| chr2:230652913-230917656 | CleftProband_126 | Gain | 264744 | 2q36.3           | 1.55  | 0.59  | 199  | 3  | 129 | <i>TRIP12, FBXO36, SLC16A14</i>                                                              |
| chr2:44082832-44100834   | CleftProband_9   | Gain | 18003  | 2p21             | 4.53  | 0.83  | 8    | 1  | 2   | <i>ABCG8</i>                                                                                 |
| chr2:63868701-64136659   | CleftProband_63  | Loss | 267959 | 2p15             | 23.58 | -0.92 | 206  | 2  | 26  | <i>UGP2, VPS54</i>                                                                           |
| chr20:12824479-13341144  | CleftProband_71  | Loss | 516666 | 20p12.1          | 0.34  | -1.00 | 422  | 6  | 37  | <i>LINC01722, LOC102606466, LINC01723, SPTLC3, ISM1-AS1, ISM1</i>                            |
| chr20:25434138-25593810  | CleftProband_53  | Gain | 159673 | 20p11.21         | 2.35  | 0.61  | 119  | 2  | 48  | <i>NINL, NANP</i>                                                                            |
| chr20:29904648-30187906  | CleftProband_96  | Gain | 283259 | 20q11.21         | 0.48  | 0.60  | 205  | 10 | 86  | <i>DEFB118, DEFB119, DEFB121, DEFB122, DEFB123, DEFB124, REM1, LINC00028, HM13, HM13-AS1</i> |
| chr20:54947631-54975595  | CleftProband_115 | Gain | 27965  | 20q13.2 - q13.31 | 0.22  | 0.58  | 24   | 2  | 86  | <i>AURKA, CSTF1</i>                                                                          |
| chr21:15555375-15573280  | CleftProband_134 | Loss | 17906  | 21q11.2          | 0.00  | -1.09 | 11   | 1  | 10  | <i>LIPI</i>                                                                                  |
| chr21:46290731-46314521  | CleftProband_93  | Gain | 23791  | 21q22.3          | 4.91  | 0.58  | 19   | 2  | 24  | <i>PTTG1IP, ITGB2</i>                                                                        |
| chr22:19020530-          | CleftProband_102 | Gain | 239438 | 22q11.21         | 31.03 | 0.62  | 1492 | 41 | 917 | <i>DGCR11, DGCR2, TSSK2, ESS2, GSC2,</i>                                                     |

|                          |                  |      |        |          |      |       |     |   |     |                                                                                                                                                                                                                                                                                                                                                                                                                                                                                                       |
|--------------------------|------------------|------|--------|----------|------|-------|-----|---|-----|-------------------------------------------------------------------------------------------------------------------------------------------------------------------------------------------------------------------------------------------------------------------------------------------------------------------------------------------------------------------------------------------------------------------------------------------------------------------------------------------------------|
| 21464915                 |                  |      | 5      |          |      |       |     |   |     | <i>LINC01311, SLC25A1, CLTCL1, HIRA, MRPL40, C22orf39, UFD1, CDC45, CLDN5, LINC00895, SEPT5, SEPT5-GP1BB, GP1BB, TBX1, GNB1L, RTL10, TXNRD2, COMT, MIR4761, ARVCF, MIR185, TANGO2, MIR3618, MIR1306, DGCR8, TRMT2A, MIR6816, RANBP1, SNORA77B, ZDHHC8, CCDC188, LOC284865, LINC00896, MIR1286, RTN4R, DGCR6L, ZNF74, SCARF2, KLHL22, MED15, POM121L4P, TMEM191A, SERPIND1, PI4KA, SNAP29, CRKL, LINC01637, AIFM3, LZTR1, THAP7, THAP7-AS1, TUBA3FP, P2RX6, SLC7A4, MIR649, P2RX6P, LRRC74B, BCRP2</i> |
| chr22:50961823-50975550  | CleftProband_49  | Loss | 13728  | 22q13.33 | 0.00 | -0.76 | 9   | 4 | 66  | <i>NCAPH2, SCO2, TYMP, ODF3B</i>                                                                                                                                                                                                                                                                                                                                                                                                                                                                      |
| chr3:147089763-147111215 | CleftProband_71  | Gain | 21453  | 3q24     | 0.00 | 0.46  | 19  | 1 | 17  | <i>ZIC4</i>                                                                                                                                                                                                                                                                                                                                                                                                                                                                                           |
| chr3:154454306-          | CleftProband_118 | Gain | 839402 | 3q25.2 - | 1.90 | 0.63  | 582 | 6 | 152 | <i>MME, LINC01487,</i>                                                                                                                                                                                                                                                                                                                                                                                                                                                                                |

|                              |                  |      |             |         |       |       |     |    |     |                                                                                        |
|------------------------------|------------------|------|-------------|---------|-------|-------|-----|----|-----|----------------------------------------------------------------------------------------|
| 155293707                    |                  |      |             | q25.31  |       |       |     |    |     | <i>DWRF,<br/>LOC100507537,<br/>PLCH1-AS2, PLCH1</i>                                    |
| chr3:184594308-<br>184629531 | CleftProband_124 | Gain | 35224       | 3q27.2  | 0.00  | 0.90  | 31  | 1  | 8   | <i>VPS8</i>                                                                            |
| chr3:196381991-<br>196392263 | CleftProband_40  | Loss | 10273       | 3q29    | 0.00  | -1.03 | 8   | 1  | 1   | <i>NRROS</i>                                                                           |
| chr3:28319094-<br>28496647   | CleftProband_14  | Gain | 177554      | 3p24.1  | 22.43 | 0.58  | 124 | 3  | 60  | <i>CMC1, AZI2, ZCWPW2</i>                                                              |
| chr3:41322324-<br>41638028   | CleftProband_18  | Loss | 315705      | 3p22.1  | 8.05  | -0.87 | 214 | 1  | 17  | <i>ULK4</i>                                                                            |
| chr3:61011417-<br>61038195   | CleftProband_45  | Loss | 26779       | 3p14.2  | 0.00  | -1.02 | 18  | 1  | 4   | <i>FHIT</i>                                                                            |
| chr3:63627841-<br>63647102   | CleftProband_10  | Loss | 19262       | 3p14.2  | 0.00  | -0.94 | 12  | 1  | 3   | <i>SNTN</i>                                                                            |
| chr4:102005257-<br>102052937 | CleftProband_124 | Gain | 47681       | 4q23    | 1.19  | 0.76  | 36  | 1  | 12  | <i>PPP3CA</i>                                                                          |
| chr4:103955997-<br>104097535 | CleftProband_6   | Gain | 141539      | 4q24    | 1.60  | 0.51  | 120 | 3  | 103 | <i>SLC9B2, BDH2, CENPE</i>                                                             |
| chr4:106532779-<br>106543507 | CleftProband_92  | Loss | 10729       | 4q24    | 0.00  | -0.76 | 10  | 1  | 2   | <i>ARHGEF38</i>                                                                        |
| chr4:17420017-<br>18685859   | CleftProband_93  | Gain | 126584<br>3 | 4p15.32 | 2.71  | 0.63  | 945 | 8  | 180 | <i>QDPR, CLRN2, LAP3,<br/>MED28, FAM184B,<br/>DCAF16, NCAPG,<br/>LCORL</i>             |
| chr4:39284028-<br>39549623   | CleftProband_107 | Gain | 265596      | 4p14    | 8.05  | 0.61  | 188 | 11 | 152 | <i>WDR19, RFC1**,<br/>MIR1273H, MIR5591,<br/>KLB, RPL9, LIAS,<br/>LOC401127, UGDH,</i> |

|                          |                  |      |        |         |      |       |     |   |     |                                                                           |
|--------------------------|------------------|------|--------|---------|------|-------|-----|---|-----|---------------------------------------------------------------------------|
|                          |                  |      |        |         |      |       |     |   |     | <i>UGDH-AS1, SMIM14</i>                                                   |
| chr4:52804406-53189333   | CleftProband_116 | Gain | 384928 | 4q12    | 1.39 | 0.62  | 253 | 4 | 77  | <i>LRRC66, SGCB, LINC02480, SPATA18</i>                                   |
| chr4:83903642-83942189   | CleftProband_96  | Gain | 38548  | 4q21.22 | 0.00 | 0.46  | 21  | 1 | 14  | <i>LIN54</i>                                                              |
| chr5:148435735-148447141 | CleftProband_8   | Loss | 11407  | 5q33.1  | 0.00 | -0.89 | 10  | 2 | 3   | <i>SH3TC2, LOC255187</i>                                                  |
| chr5:150065365-150076702 | CleftProband_45  | Gain | 11338  | 5q33.1  | 0.00 | 0.60  | 9   | 1 | 7   | <i>RBM22</i>                                                              |
| chr5:178591822-178720873 | CleftProband_10  | Gain | 129052 | 5q35.3  | 2.66 | 0.68  | 99  | 1 | 6   | <i>ADAMTS2</i>                                                            |
| chr5:52952870-52974339   | CleftProband_23  | Gain | 21470  | 5q11.2  | 0.00 | 0.59  | 13  | 1 | 4   | <i>NDUFS4</i>                                                             |
| chr5:53310720-53817429   | CleftProband_119 | Gain | 506710 | 5q11.2  | 0.40 | 0.60  | 389 | 5 | 14  | <i>MIR4459, ARL15, LINC01033, HSPB3, SNX18</i>                            |
| chr5:53310720-53817429   | CleftProband_5   | Gain | 506710 | 5q11.2  | 0.40 | 0.63  | 389 | 5 | 14  | <i>MIR4459, ARL15, LINC01033, HSPB3, SNX18</i>                            |
| chr6:118765650-118993251 | CleftProband_140 | Gain | 227602 | 6q22.31 | 6.38 | 0.60  | 179 | 3 | 35  | <i>BRD7P3, PLN, CEP85L</i>                                                |
| chr6:127972290-128091747 | CleftProband_127 | Gain | 119458 | 6q22.33 | 4.68 | 0.60  | 89  | 1 | 8   | <i>THEMIS</i>                                                             |
| chr6:158303307-159014483 | CleftProband_132 | Gain | 711176 | 6q25.3  | 0.66 | 1.17  | 412 | 6 | 114 | <i>SNX9, SYNJ2-IT1, SYNJ2, SERAC1, GTF2H5, SNORA116, TULP4**, TMEM181</i> |



|                          |                  |      |        |         |       |       |     |   |    |                                             |
|--------------------------|------------------|------|--------|---------|-------|-------|-----|---|----|---------------------------------------------|
| chr6:39881038-39915446   | CleftProband_124 | Gain | 34409  | 6p21.2  | 0.00  | 0.88  | 28  | 1 | 16 | <i>MOCSI</i>                                |
| chr6:47780655-47794305   | CleftProband_98  | Loss | 13651  | 6p12.3  | 0.00  | -1.16 | 12  | 1 | 2  | <i>OPN5</i>                                 |
| chr6:85465287-85488306   | CleftProband_130 | Gain | 23020  | 6q14.3  | 0.00  | 0.43  | 19  | 1 | 4  | <i>TBX18</i>                                |
| chr7:110244241-110315471 | CleftProband_107 | Loss | 71231  | 7q31.1  | 0.00  | -1.09 | 51  | 1 | 2  | <i>IMMP2L**</i>                             |
| chr7:126333781-126347736 | CleftProband_129 | Gain | 13956  | 7q31.33 | 0.00  | 0.65  | 12  | 1 | 1  | <i>GRM8</i>                                 |
| chr7:144075022-144105721 | CleftProband_120 | Gain | 30700  | 7q35    | 47.09 | 0.51  | 27  | 2 | 11 | <i>ARHGEF5, NOBOX</i>                       |
| chr7:35072697-35087865   | CleftProband_50  | Gain | 15169  | 7p14.3  | 46.29 | 0.76  | 10  | 1 | 1  | <i>DPY19LI</i>                              |
| chr7:91771154-91787077   | CleftProband_96  | Loss | 15924  | 7q21.2  | 0.00  | -0.74 | 10  | 2 | 4  | <i>LRRD1, CYP51A1-AS1</i>                   |
| chr8:118224513-118884227 | CleftProband_24  | Gain | 659715 | 8q24.11 | 1.29  | 0.66  | 531 | 2 | 17 | <i>MED30, EXT1</i>                          |
| chr8:125432724-125484098 | CleftProband_8   | Gain | 51375  | 8q24.13 | 2.22  | 0.62  | 42  | 2 | 2  | <i>TRMT12, RNF139-AS1</i>                   |
| chr8:13121606-13223032   | CleftProband_103 | Loss | 101427 | 8p22    | 0.33  | -1.02 | 86  | 1 | 3  | <i>DLC1</i>                                 |
| chr8:144766006-144796891 | CleftProband_7   | Gain | 30886  | 8q24.3  | 7.40  | 0.51  | 22  | 4 | 78 | <i>ZNF707, BREA2, CCDC166, LOC101928160</i> |
| chr8:81874684-81895324   | CleftProband_17  | Gain | 20641  | 8q21.13 | 0.00  | 0.68  | 18  | 1 | 2  | <i>PAG1</i>                                 |

|                          |                  |      |              |         |       |       |     |   |    |                            |
|--------------------------|------------------|------|--------------|---------|-------|-------|-----|---|----|----------------------------|
| chr8:81874684-81895324   | CleftProband_89  | Gain | 20641        | 8q21.13 | 0.00  | 0.74  | 18  | 1 | 2  | <i>PAG1</i>                |
| chr8:92115755-92186155   | CleftProband_111 | Loss | 70401        | 8q21.3  | 8.28  | -0.90 | 49  | 1 | 4  | <i>LRRC69</i>              |
| chr9:28608502-28744856   | CleftProband_23  | Loss | 136354       | 9p21.1  | 24.59 | -0.96 | 70  | 1 | 2  | <i>LINGO2</i>              |
| chr9:28609587-28744856   | CleftProband_128 | Loss | 135270       | 9p21.1  | 20.44 | -0.94 | 102 | 1 | 3  | <i>LINGO2</i>              |
| chr9:9934053-9954893     | CleftProband_82  | Loss | 20841        | 9p23    | 1.59  | -1.14 | 16  | 1 | 1  | <i>PTPRD**</i>             |
| chrX:117775819-117816411 | CleftProband_98  | Gain | 207775<br>65 | Xq24    | 0.00  | 0.87  | 32  | 1 | 12 | <i>DOCK11, IL13RA1</i>     |
| chrX:117816411-138650338 | CleftProband_81  | Gain | 670973       | Xq27.1  | 4.07  | 0.55  | 488 | 3 | 23 | <i>FGF13, SRD5A1P1, F9</i> |
| chrX:32711758-32827653   | CleftProband_127 | Gain | 115896       | Xp21.1  | 1.73  | 0.43  | 83  | 1 | 12 | <i>DMD**</i>               |

**Supplemental Table 1: All CNVs after filtering.** 134 CNVs were identified, 51 of which were deletions (Loss) and 83 of which were amplifications (Gain). \*\*Indicates gene associated with clefting (*IFIT2*, *SLC46A1*, *RFC1*, *TULP4*, *IMPP2L*, *PTPRD*, *DMD*, *CDH1*, *NOSIP*).

| <b>Gene Symbols</b> | <b>Total CNVs Overlapping Gene</b> | <b>Deletions Overlapping Gene</b> | <b>Amplifications Overlapping Gene</b> | <b>Cytoband</b>  | <b>Associated with Clefting in PubMed</b> | <b>MGI Mouth Expression</b> |
|---------------------|------------------------------------|-----------------------------------|----------------------------------------|------------------|-------------------------------------------|-----------------------------|
| ABCG8               | 1                                  | 0                                 | 1                                      | 2p21             | 0                                         | 0                           |
| ABR                 | 1                                  | 0                                 | 1                                      | 17p13.3          | 0                                         | x                           |
| ACOT11              | 1                                  | 0                                 | 1                                      | 1p32.3           | 0                                         | 0                           |
| ADAMTS2             | 1                                  | 0                                 | 1                                      | 5q35.3           | 0                                         | 0                           |
| AKAP3               | 1                                  | 0                                 | 1                                      | 12p13.32         | 0                                         | 0                           |
| ARHGEF5             | 1                                  | 0                                 | 1                                      | 7q35             | 0                                         | 0                           |
| ATF6                | 1                                  | 0                                 | 1                                      | 1q23.3           | 0                                         | 0                           |
| AURKA               | 1                                  | 0                                 | 1                                      | 20q13.2 - q13.31 | 0                                         | x                           |
| AZI2                | 1                                  | 0                                 | 1                                      | 3p24.1           | 0                                         | 0                           |
| B4GALNT4            | 1                                  | 0                                 | 1                                      | 11p15.5          | 0                                         | 0                           |
| BDH2                | 1                                  | 0                                 | 1                                      | 4q24             | 0                                         | x                           |
| C10orf67            | 1                                  | 0                                 | 1                                      | 10p12.2          | 0                                         |                             |
| CCDC166             | 1                                  | 0                                 | 1                                      | 8q24.3           | 0                                         | 0                           |
| CCL20               | 1                                  | 0                                 | 1                                      | 2q36.3           | 0                                         | 0                           |
| CENPE               | 1                                  | 0                                 | 1                                      | 4q24             | 0                                         | 0                           |
| CEP85L              | 1                                  | 0                                 | 1                                      | 6q22.31          | 0                                         | 0                           |
| CFAP46              | 1                                  | 0                                 | 1                                      | 10q26.3          | 0                                         | 0                           |
| CH25H               | 1                                  | 0                                 | 1                                      | 10q23.31         | 0                                         | 0                           |
| CLRN2               | 1                                  | 0                                 | 1                                      | 4p15.32          | 0                                         | 0                           |
| CMC1                | 1                                  | 0                                 | 1                                      | 3p24.1           | 0                                         | 0                           |
| CSTF1               | 1                                  | 0                                 | 1                                      | 20q13.2 - q13.31 | 0                                         | 0                           |
| DAW1                | 1                                  | 0                                 | 1                                      | 2q36.3           | 0                                         |                             |
| DCAF16              | 1                                  | 0                                 | 1                                      | 4p15.32          | 0                                         | 0                           |
| DEFB118             | 1                                  | 0                                 | 1                                      | 20q11.21         | 0                                         | 0                           |
| DEFB119             | 1                                  | 0                                 | 1                                      | 20q11.21         | 0                                         | 0                           |
| DEFB121             | 1                                  | 0                                 | 1                                      | 20q11.21         | 0                                         |                             |

|          |   |   |   |                 |   |   |
|----------|---|---|---|-----------------|---|---|
| DEFB123  | 1 | 0 | 1 | 20q11.21        | 0 |   |
| DEFB124  | 1 | 0 | 1 | 20q11.21        | 0 |   |
| DHX8     | 1 | 0 | 1 | 17q21.31        | 0 | 0 |
| DIP2C    | 1 | 0 | 1 | 10p15.3         | 0 | 0 |
| DMD      | 1 | 0 | 1 | Xp21.1          | x | x |
| DOCK11   | 1 | 0 | 1 | Xq24            | 0 | 0 |
| DPY19L1  | 1 | 0 | 1 | 7p14.3          | 0 | 0 |
| DTL      | 1 | 0 | 1 | 1q32.3          | 0 | 0 |
| DUSP12   | 1 | 0 | 1 | 1q23.3          | 0 | 0 |
| DWORF    | 1 | 0 | 1 | 3q25.2 - q25.31 | 0 | 0 |
| DYRK4    | 1 | 0 | 1 | 12p13.32        | 0 | 0 |
| ETV4     | 1 | 0 | 1 | 17q21.31        | 0 | x |
| EXT1     | 1 | 0 | 1 | 8q24.11         | 0 | x |
| F9       | 1 | 0 | 1 | Xq27.1          | 0 | 0 |
| FAM184B  | 1 | 0 | 1 | 4p15.32         | 0 | 0 |
| FBXO36   | 1 | 0 | 1 | 2q36.3          | 0 | 0 |
| FCGR2B   | 1 | 0 | 1 | 1q23.3          | 0 | 0 |
| FCRLA    | 1 | 0 | 1 | 1q23.3          | 0 | 0 |
| FCRLB    | 1 | 0 | 1 | 1q23.3          | 0 | 0 |
| FGF13    | 1 | 0 | 1 | Xq27.1          | 0 | x |
| GPR3     | 1 | 0 | 1 | 1p36.11         | 0 | x |
| GRM8     | 1 | 0 | 1 | 7q31.33         | 0 | 0 |
| GTF2H5   | 1 | 0 | 1 | 6q25.3          | 0 | x |
| HERC4    | 1 | 0 | 1 | 10q21.3         | 0 | 0 |
| HM13     | 1 | 0 | 1 | 20q11.21        | 0 | 0 |
| HS3ST3A1 | 1 | 0 | 1 | 17p12           | 0 | x |
| HSFX1    | 1 | 0 | 1 | Xq28            | 0 | 0 |
| HSFX2    | 1 | 0 | 1 | Xq28            | 0 | 0 |
| IFIT1    | 1 | 0 | 1 | 10q23.31        | 0 | x |
| IFIT1B   | 1 | 0 | 1 | 10q23.31        | 0 | 0 |

|              |   |   |   |                 |   |   |
|--------------|---|---|---|-----------------|---|---|
| IFIT2        | 1 | 0 | 1 | 10q23.31        | x | 0 |
| IFIT3        | 1 | 0 | 1 | 10q23.31        | 0 | 0 |
| IFIT5        | 1 | 0 | 1 | 10q23.31        | 0 | 0 |
| IGFBP2       | 1 | 0 | 1 | 2q35            | 0 | 0 |
| IL13RA1      | 1 | 0 | 1 | Xq24            | 0 | 0 |
| INTS7        | 1 | 0 | 1 | 1q32.3          | 0 | 0 |
| IQSEC3       | 1 | 0 | 1 | 12p13.33        | 0 | 0 |
| ITGB2        | 1 | 0 | 1 | 21q22.3         | 0 | x |
| KDM5A        | 1 | 0 | 1 | 12p13.33        | 0 | x |
| KLB          | 1 | 0 | 1 | 4p14            | 0 | 0 |
| LAP3         | 1 | 0 | 1 | 4p15.32         | 0 | x |
| LCORL        | 1 | 0 | 1 | 4p15.32         | 0 | 0 |
| LIAS         | 1 | 0 | 1 | 4p14            | 0 | x |
| LIN54        | 1 | 0 | 1 | 4q21.22         | 0 | 0 |
| LIPA         | 1 | 0 | 1 | 10q23.31        | 0 | 0 |
| LOC100507537 | 1 | 0 | 1 | 3q25.2 - q25.31 | 0 | 0 |
| LRRC66       | 1 | 0 | 1 | 4q12            | 0 | 0 |
| MAGEA11      | 1 | 0 | 1 | Xq28            | 0 | 0 |
| MAGEA9       | 1 | 0 | 1 | Xq28            | 0 | 0 |
| MAGEA9B      | 1 | 0 | 1 | Xq28            | 0 | 0 |
| MED28        | 1 | 0 | 1 | 4p15.32         | 0 | x |
| MED30        | 1 | 0 | 1 | 8q24.11         | 0 | 0 |
| MEOX1        | 1 | 0 | 1 | 17q21.31        | 0 | 0 |
| MME          | 1 | 0 | 1 | 3q25.2 - q25.31 | 0 | x |
| MOCS1        | 1 | 0 | 1 | 6p21.2          | 0 | 0 |
| MYPN         | 1 | 0 | 1 | 10q21.3         | 0 | 0 |
| NANP         | 1 | 0 | 1 | 20p11.21        | 0 | x |
| NCAPG        | 1 | 0 | 1 | 4p15.32         | 0 | x |
| NCKAP5       | 1 | 0 | 1 | 2q21.2          | 0 | 0 |
| NDUFA9       | 1 | 0 | 1 | 12p13.32        | 0 | x |

|          |   |   |   |                 |   |   |
|----------|---|---|---|-----------------|---|---|
| NDUFS4   | 1 | 0 | 1 | 5q11.2          | 0 | x |
| NINL     | 1 | 0 | 1 | 20p11.21        | 0 | 0 |
| NOBOX    | 1 | 0 | 1 | 7q35            | 0 | 0 |
| PANK1    | 1 | 0 | 1 | 10q23.31        | 0 | x |
| PLCH1    | 1 | 0 | 1 | 3q25.2 - q25.31 | 0 | 0 |
| PLN      | 1 | 0 | 1 | 6q22.31         | 0 | x |
| PPP3CA   | 1 | 0 | 1 | 4q23            | 0 | 0 |
| PTTG1IP  | 1 | 0 | 1 | 21q22.3         | 0 | x |
| QDPR     | 1 | 0 | 1 | 4p15.32         | 0 | 0 |
| RAP2A    | 1 | 0 | 1 | 13q32.1         | 0 | 0 |
| RBM22    | 1 | 0 | 1 | 5q33.1          | 0 | 0 |
| REM1     | 1 | 0 | 1 | 20q11.21        | 0 | x |
| RFC1     | 1 | 0 | 1 | 4p14            | x | x |
| RNF125   | 1 | 0 | 1 | 18q12.1         | 0 | 0 |
| RNF138   | 1 | 0 | 1 | 18q12.1         | 0 | x |
| RNF213   | 1 | 0 | 1 | 17q25.3         | 0 | 0 |
| RPL9     | 1 | 0 | 1 | 4p14            | 0 | 0 |
| SARM1    | 1 | 0 | 1 | 17q11.2         | 0 | 0 |
| SERAC1   | 1 | 0 | 1 | 6q25.3          | 0 | 0 |
| SGCB     | 1 | 0 | 1 | 4q12            | 0 | 0 |
| SLC16A12 | 1 | 0 | 1 | 10q23.31        | 0 | 0 |
| SLC16A14 | 1 | 0 | 1 | 2q36.3          | 0 | 0 |
| SLC26A11 | 1 | 0 | 1 | 17q25.3         | 0 | 0 |
| SLC46A1  | 1 | 0 | 1 | 17q11.2         | x | 0 |
| SLC6A13  | 1 | 0 | 1 | 12p13.33        | 0 | x |
| SLC9B2   | 1 | 0 | 1 | 4q24            | 0 | x |
| SMCHD1   | 1 | 0 | 1 | 18p11.32        | 0 | 0 |
| SMIM14   | 1 | 0 | 1 | 4p14            | 0 | x |
| SNX9     | 1 | 0 | 1 | 6q25.3          | 0 | x |
| SPATA18  | 1 | 0 | 1 | 4q12            | 0 | 0 |

|          |   |   |   |          |   |   |
|----------|---|---|---|----------|---|---|
| STXBP6   | 1 | 0 | 1 | 14q12    | 0 | 0 |
| SYNJ2    | 1 | 0 | 1 | 6q25.3   | 0 | x |
| TBX18    | 1 | 0 | 1 | 6q14.3   | 0 | x |
| TCF12    | 1 | 0 | 1 | 15q21.3  | 0 | x |
| TMEM181  | 1 | 0 | 1 | 6q25.3   | 0 | 0 |
| TMEM185A | 1 | 0 | 1 | Xq28     | 0 | 0 |
| TPD52L1  | 1 | 0 | 1 | 6q22.31  | 0 | 0 |
| TRIP12   | 1 | 0 | 1 | 2q36.3   | 0 | 0 |
| TRMT12   | 1 | 0 | 1 | 8q24.13  | 0 | 0 |
| TUBAL3   | 1 | 0 | 1 | 10p15.1  | 0 | 0 |
| TUBD1    | 1 | 0 | 1 | 17q23.1  | 0 | 0 |
| TULP4    | 1 | 0 | 1 | 6q25.3   | x | x |
| UCN3     | 1 | 0 | 1 | 10p15.1  | 0 | 0 |
| UGDH     | 1 | 0 | 1 | 4p14     | 0 | x |
| VPS8     | 1 | 0 | 1 | 3q27.2   | 0 | 0 |
| WASF2    | 1 | 0 | 1 | 1p36.11  | 0 | 0 |
| WDR19    | 1 | 0 | 1 | 4p14     | 0 | x |
| ZCWPW2   | 1 | 0 | 1 | 3p24.1   | 0 | 0 |
| ZIC4     | 1 | 0 | 1 | 3q24     | 0 | 0 |
| ZNF519   | 1 | 0 | 1 | 18p11.21 | 0 | 0 |
| ZNF707   | 1 | 0 | 1 | 8q24.3   | 0 | 0 |
| AGBL4    | 1 | 1 | 0 | 1p33     | 0 | 0 |
| ARHGEF38 | 1 | 1 | 0 | 4q24     | 0 | 0 |
| CDH1     | 1 | 1 | 0 | 16q22.1  | x | x |
| CDH3     | 1 | 1 | 0 | 16q22.1  | 0 | x |
| COA6     | 1 | 1 | 0 | 1q42.2   | 0 | 0 |
| DLC1     | 1 | 1 | 0 | 8p22     | 0 | x |
| FHIT     | 1 | 1 | 0 | 3p14.2   | 0 | 0 |
| HBA1     | 1 | 1 | 0 | 16p13.3  | 0 | 0 |
| HBQ1     | 1 | 1 | 0 | 16p13.3  | 0 | 0 |



|           |   |   |   |          |   |   |
|-----------|---|---|---|----------|---|---|
| IMMP2L    | 1 | 1 | 0 | 7q31.1   | x | 0 |
| ISM1      | 1 | 1 | 0 | 20p12.1  | 0 | x |
| LIPI      | 1 | 1 | 0 | 21q11.2  | 0 | x |
| LRRC69    | 1 | 1 | 0 | 8q21.3   | 0 | 0 |
| LRRD1     | 1 | 1 | 0 | 7q21.2   | 0 |   |
| MS4A10    | 1 | 1 | 0 | 11q12.2  | 0 | 0 |
| NCAPH2    | 1 | 1 | 0 | 22q13.33 | 0 | 0 |
| NOSIP     | 1 | 1 | 0 | 19q13.33 | x |   |
| NRROS     | 1 | 1 | 0 | 3q29     | 0 | 0 |
| ODF3B     | 1 | 1 | 0 | 22q13.33 | 0 |   |
| OPN5      | 1 | 1 | 0 | 6p12.3   | 0 | 0 |
| OR51B5    | 1 | 1 | 0 | 11p15.4  | 0 | 0 |
| OR52D1    | 1 | 1 | 0 | 11p15.4  | 0 | 0 |
| PCDH9     | 1 | 1 | 0 | 13q21.32 | 0 | x |
| PIAS2     | 1 | 1 | 0 | 18q21.1  | 0 | x |
| PTPRD     | 1 | 1 | 0 | 9p23     | 0 | x |
| RCN3      | 1 | 1 | 0 | 19q13.33 | 0 | 0 |
| RGMA      | 1 | 1 | 0 | 15q26.1  | 0 | 0 |
| RHBDL2    | 1 | 1 | 0 | 1p34.3   | 0 | x |
| SCO2      | 1 | 1 | 0 | 22q13.33 | 0 | x |
| SH3TC2    | 1 | 1 | 0 | 5q33.1   | 0 | 0 |
| SLC4A10   | 1 | 1 | 0 | 2q24.2   | 0 | 0 |
| SNTN      | 1 | 1 | 0 | 3p14.2   | 0 | 0 |
| SPTLC3    | 1 | 1 | 0 | 20p12.1  | 0 | x |
| ST8SIA6   | 1 | 1 | 0 | 10p12.33 | 0 | 0 |
| STK33     | 1 | 1 | 0 | 11p15.4  | 0 | 0 |
| TARBP1    | 1 | 1 | 0 | 1q42.2   | 0 | 0 |
| TNFAIP8L3 | 1 | 1 | 0 | 15q21.2  | 0 | 0 |
| TYMP      | 1 | 1 | 0 | 22q13.33 | 0 | x |
| UGP2      | 1 | 1 | 0 | 2p15     | 0 | x |

|          |   |   |   |                      |   |   |
|----------|---|---|---|----------------------|---|---|
| ULK4     | 1 | 1 | 0 | 3p22.1               | 0 | 0 |
| VPS54    | 1 | 1 | 0 | 2p15                 | 0 | 0 |
| ZFP90    | 1 | 1 | 0 | 16q22.1              | 0 | 0 |
| ZNF695   | 1 | 1 | 0 | 1q44                 | 0 | 0 |
| ARL15    | 2 | 0 | 2 | 5q11.2               | 0 |   |
| EFCAB2   | 2 | 0 | 2 | 1q44                 | 0 | 0 |
| HSPB3    | 2 | 0 | 2 | 5q11.2               | x | x |
| MSMB     | 2 | 0 | 2 | 10q11.23             | 0 | 0 |
| PAG1     | 2 | 0 | 2 | 8q21.13              | 0 | 0 |
| SH3YL1   | 2 | 0 | 2 | 2p25.3               | 0 |   |
| SNX18    | 2 | 0 | 2 | 5q11.2               | 0 | 0 |
| THEMIS   | 2 | 0 | 2 | 6q22.33              | 0 | 0 |
| TIMM23B  | 2 | 0 | 2 | 10q11.23             | 0 | x |
| CAP1     | 2 | 2 | 0 | 1p34.2               | 0 | 0 |
| CD163L1  | 2 | 2 | 0 | 12p13.31             |   |   |
| FSCB     | 2 | 2 | 0 | 14q21.3              | 0 | 0 |
| LINGO2   | 2 | 2 | 0 | 9p21.1               | 0 | 0 |
| MALRD1   | 2 | 2 | 0 | 10p12.33 -<br>p12.32 | 0 |   |
| SDE2     | 2 | 2 | 0 | 1q42.12              |   |   |
| HNRNPL   | 3 | 3 | 0 | 19q13.2              | 0 | 0 |
| ATP6V1C2 | 4 | 0 | 4 | 2p25.1               | 0 | 0 |
| DPP10    | 4 | 4 | 0 | 2q14.1               | 0 |   |
| RAB21    | 5 | 0 | 5 | 12q21.1              | 0 | x |
| TBC1D15  | 5 | 0 | 5 | 12q21.1              | 0 | 0 |

**Supplemental Table 2: Genes overlapped by CNVs within the cohort after filters.** We identified 200 genes overlapped by deletions and amplifications passing our filtering pipeline in the case cohort. Genes were annotated for known association with clefting in PubMed and expression within the murine mouth in MGI. Highlighted genes were selected as plausible novel clefting genes after assessment for low haploinsufficiency scores ( $\leq 10$ ), having a higher frequency of CNV overlap in cases than controls, and craniofacial expression in the mouse (MGI).

## FILIPINOS

| Variant | Nucleotide Change | Chromosome Position | Exon | Fil. Ctrl. Alleles | Fil. Cleft Alleles | Fil. Ctrl. Alleles Percent | Fil. Cleft Alleles Percent | Fil. Ctrl. vs Case Fold Change | Fil. Cleft vs Fil. Ctrl. Fold Change | PhyloP LRT (UCSC) | PhastCon (UCSC) | Prediction Algorithm (Damaging) |
|---------|-------------------|---------------------|------|--------------------|--------------------|----------------------------|----------------------------|--------------------------------|--------------------------------------|-------------------|-----------------|---------------------------------|
| E89K    | c.265G>A          | chr20:13,251,277    | 2    | 1/628              | 0/538              | 0.16                       | 0                          | N/A                            | 0                                    | 6.22              | 1               | MT; FMK                         |
| S102P   | c.304T>C          | chr20:13,251,316    | 2    | 1/632              | 0/538              | 0.16                       | 0                          | N/A                            | 0                                    | 4.62              | 1               | P; MT; FMK                      |
| Q126E   | c.376C>G          | chr20:13,251,388    | 2    | 1/628              | 1/538              | 0.16                       | 0.19                       | 0.86                           | 1.17                                 | 7.25              | 1               | P; MT; FMK                      |
| D157A   | c.470A>C          | chr20:13,260,372    | 3    | 3/676              | 2/516              | 0.44                       | 0.39                       | 1.14                           | 0.87                                 | 6.60              | 1               | P; MT; FMK                      |
| R159Q   | c.476G>A          | chr20:13,260,378    | 3    | 0/688              | 0/516              | 0                          | 0                          | N/A                            | N/A                                  | 4.23              | 1               | MT; FMK                         |
| D186N   | c.556G>A          | chr20:13,260,458    | 3    | 1/688              | 0/516              | 0.15                       | 0                          | N/A                            | 0                                    | 5.84              | 1               | MT; FMK                         |
| N188S   | c.563A>G          | chr20:13,260,465    | 3    | 0/688              | 0/516              | 0                          | 0                          | N/A                            | N/A                                  | 8.41              | 1               | P; MT; FMK                      |
| P193R   | c.578C>G          | chr20:13,260,480    | 3    | 47/688             | 37/528             | 6.83                       | 7.01                       | 0.97                           | 1.03                                 | 4.13              | 0.99            | MT; FMK                         |
| S305N   | c.914G>A          | chr20:13,279,625    | 6    | 4/168              | 0/550              | 2.15                       | 0                          | N/A                            | 0                                    | 6.43              | 1               | P; MT; FMK                      |

**EUROPEANS**

| <b>Variant</b> | <b>Nucleotide Change</b> | <b>Chromosome Position</b> | <b>Exon</b> | <b>Fil. Ctrl. Alleles</b> | <b>Fil. Cleft Alleles</b> | <b>Fil. Ctrl. Alleles Percent</b> | <b>Fil. Cleft Alleles Percent</b> | <b>Fil. Ctrl. vs Case Fold Change</b> | <b>Fil. Cleft vs Fil. Ctrl. Fold Change</b> | <b>PhyloP LRT (UCSC)</b> | <b>PhastCon (UCSC)</b> | <b>Prediction Algorithm (Damaging)</b> |
|----------------|--------------------------|----------------------------|-------------|---------------------------|---------------------------|-----------------------------------|-----------------------------------|---------------------------------------|---------------------------------------------|--------------------------|------------------------|----------------------------------------|
| E89K           | c.265G>A                 | chr20:13,251,277           | 2           | 0/8400                    | 0/480                     | 0                                 | 0                                 | N/A                                   | 0                                           | 6.22                     | 1                      | MT; FMK                                |
| S102P          | c.304T>C                 | chr20:13,251,316           | 2           | 320/8400                  | 8/480                     | 3.81                              | 1.67                              | 2.29                                  | 0.44                                        | 4.62                     | 1                      | P; MT; FMK                             |
| Q126E          | c.376C>G                 | chr20:13,251,388           | 2           | 0/8400                    | 0/480                     | 0                                 | 0                                 | N/A                                   | 0                                           | 7.25                     | 1                      | P; MT; FMK                             |
| D157A          | c.470A>C                 | chr20:13,260,372           | 3           | 0/8400                    | 0/465                     | 0                                 | 0                                 | N/A                                   | 0                                           | 6.60                     | 1                      | P; MT; FMK                             |
| <b>R159Q</b>   | c.476G>A                 | <b>chr20:13,260,378</b>    | <b>3</b>    | <b>4/8400</b>             | <b>1/456</b>              | <b>0.02</b>                       | <b>0.22</b>                       | <b>0.11</b>                           | <b>9.21</b>                                 | <b>4.23</b>              | <b>1</b>               | MT; FMK                                |
| D186N          | c.556G>A                 | chr20:13,260,458           | 3           | 0/8400                    | 0/456                     | 0                                 | 0                                 | N/A                                   | 0                                           | 5.84                     | 1                      | MT; FMK                                |
| <b>N188S</b>   | c.563A>G                 | <b>chr20:13,260,465</b>    | <b>3</b>    | <b>0/8400</b>             | <b>1/456</b>              | <b>0</b>                          | <b>0.22</b>                       | <b>0</b>                              | <b>&gt;18</b>                               | <b>8.41</b>              | <b>1</b>               | P; MT; FMK                             |
| P193R          | c.578C>G                 | chr20:13,260,480           | 3           | 6/8400                    | 0/456                     | 0.07                              | 0                                 | N/A                                   | 0                                           | 4.13                     | 0.99                   | MT; FMK                                |
| <b>S305N</b>   | c.914G>A                 | <b>chr20:13,279,625</b>    | <b>6</b>    | <b>1/8400</b>             | <b>1/489</b>              | <b>0.01</b>                       | <b>0.20</b>                       | <b>0.06</b>                           | <b>17.14</b>                                | <b>6.43</b>              | <b>1</b>               | P; MT; FMK                             |

COMBINED

| Variant      | Nucleotide Change | Chromosome Position     | Exon     | Fil. Ctrl. Alleles | Fil. Cleft Alleles | Fil. Ctrl. Alleles Percent | Fil. Cleft Alleles Percent | Fil. Ctrl. vs Case Fold Change | Fil. Cleft vs Fil. Ctrl. Fold Change | PhyloP LRT (UCSC) | PhastCon (UCSC) | Prediction Algorithm (Damaging) |
|--------------|-------------------|-------------------------|----------|--------------------|--------------------|----------------------------|----------------------------|--------------------------------|--------------------------------------|-------------------|-----------------|---------------------------------|
| E89K         | c.265G>A          | chr20:13,251,277        | 2        | 1/9028             | 0/1018             | 0.01                       | 0                          | N/A                            | 0                                    | 6.22              | 1               | MT; FMK                         |
| S102P        | c.304T>C          | chr20:13,251,316        | 2        | 321/9032           | 8/1018             | 3.55                       | 0.79                       | 4.49                           | 0.22                                 | 4.62              | 1               | P; MT; FMK                      |
| Q126E        | c.376C>G          | chr20:13,251,388        | 2        | 1/9028             | 1/1018             | 0.01                       | 0.10                       | 0.1                            | 10                                   | 7.25              | 1               | P; MT; FMK                      |
| D157A        | c.470A>C          | chr20:13,260,372        | 3        | 3/9076             | 2/981              | 0.03                       | 0.20                       | 0.15                           | 6.67                                 | 6.60              | 1               | P; MT; FMK                      |
| <b>R159Q</b> | c.476G>A          | <b>chr20:13,260,378</b> | <b>3</b> | <b>4/9088</b>      | <b>1/972</b>       | <b>0.04</b>                | <b>0.10</b>                | <b>0.40</b>                    | <b>2.25</b>                          | <b>4.23</b>       | <b>1</b>        | MT; FMK                         |
| D186N        | c.556G>A          | chr20:13,260,458        | 3        | 1/9088             | 0/972              | 0.01                       | 0                          | N/A                            | 0                                    | 5.84              | 1               | MT; FMK                         |
| <b>N188S</b> | c.563A>G          | <b>chr20:13,260,465</b> | <b>3</b> | <b>0/9088</b>      | <b>1/972</b>       | <b>0</b>                   | <b>0.10</b>                | <b>0</b>                       | <b>N/A</b>                           | <b>8.41</b>       | <b>1</b>        | P; MT; FMK                      |
| P193R        | c.578C>G          | chr20:13,260,480        | 3        | 53/9088            | 37/984             | 0.58                       | 0.04                       | 14.5                           | 0.07                                 | 4.13              | 0.99            | MT; FMK                         |
| <b>S305N</b> | c.914G>A          | <b>chr20:13,279,625</b> | <b>6</b> | <b>5/8568</b>      | <b>1/1039</b>      | <b>0.06</b>                | <b>0.10</b>                | <b>0.6</b>                     | <b>1.67</b>                          | <b>6.43</b>       | <b>1</b>        | P; MT; FMK                      |

**Supplemental Table 3: *ISMI* sequencing results.** We sequenced 520 NSCL/P subjects and identified nine missense variants in *ISMI*. Four were not reported in 1000 Genomes or EVS, and three (R159Q, N188S, S305N; highlighted in red) were overrepresented in European cases versus controls, and four (D157A, R159Q, N188S, S305N; highlighted in red) were overrepresented in cases versus controls when all variants in Europeans and Filipinos were assessed. (P – Polyphen; MT- MutationTaster; FMK – FATHMM MKL)
